# Supplementary material
Source: PubMed Central journal article supplement (PMC6102992)
Supplement: zam017188704s1.pdf [file zam017188704s1.pdf]

**Supplementary Table S1.** Ingredients and nutrient composition of experimental gestation and lactation diets (as-fed basis)

| Items                          | Gestation diet |                 | Lactation diet |
|--------------------------------|----------------|-----------------|----------------|
|                                | Control        | SF <sup>1</sup> |                |
| Ingredient, %                  |                |                 |                |
| Corn                           | 54.80          | 54.80           | 54.40          |
| Soybean meal, 43%CP            | 11.50          | 11.50           | 26.00          |
| Wheat bran                     | 0.00           | 0.00            | 11.00          |
| Soybean hull                   | 14.00          | 14.00           | 0.00           |
| Rice bran meal                 | 16.00          | 14.00           | 0.00           |
| Calcium carbonate              | 1.20           | 1.20            | 1.51           |
| Dicalcium phosphate            | 1.00           | 1.00            | 1.23           |
| Salt                           | 0.40           | 0.40            | 0.26           |
| Mildewcide <sup>2</sup>        | 0.10           | 0.10            | 0.10           |
| Choline chloride               | 0.00           | 0.00            | 1.00           |
| Fiber source                   | 0.00           | 2.00            | 0.00           |
| Premix <sup>3</sup>            | 1.00           | 1.00            | 1.50           |
| Nutrient composition           |                |                 |                |
| Net energy, MJ/kg <sup>4</sup> | 9.53           | 9.53            | 10.36          |
| Crude protein, %               | 13.96          | 13.81           | 18.92          |
| ISF, % <sup>5</sup>            | 26.95          | 26.78           | 14.45          |
| SF, % <sup>6</sup>             | 2.85           | 4.04            | 1.76           |
| NDF, % <sup>7</sup>            | 20.29          | 20.21           | 11.18          |
| ADF, % <sup>8</sup>            | 5.47           | 5.42            | 4.26           |
| Lys, % <sup>4</sup>            | 0.59           | 0.59            | 1.03           |
| Ca, % <sup>4</sup>             | 0.78           | 0.75            | 1.06           |
| Available P, % <sup>4</sup>    | 0.40           | 0.40            | 0.45           |

<sup>1</sup>SF = 2% fiber of pregelatinized waxy maize starch (95%) plus xanthan gum (5%).

<sup>2</sup>Mildewcide: ammonium propionate.

<sup>3</sup>Provided per kg of diet: Cu, 30 mg; Fe, 160 mg; Zn, 160 mg; Mn, 55 mg; I, 0.5 mg; Se, 0.5 mg; Co, 0.8 mg; Cr, 0.2 mg; Vitamin A, 14000 IU; Vitamin D<sub>3</sub>, 2900 IU; Vitamin E, 120 mg; Vitamin K<sub>3</sub>, 6 mg; Vitamin B<sub>1</sub>, 2.4 mg; Vitamin B<sub>2</sub>, 8.5 mg; Vitamin B<sub>6</sub>, 4.5 mg; Vitamin B<sub>12</sub>, 0.03 mg; Vitamin H, 0.55 mg; Pantothenic acid, 30 mg; Folic acid, 5 mg; Nicotinamide, 50 mg.

<sup>4</sup>Calculated chemical concentrations using values for feed ingredients from the NRC (2012).

<sup>5</sup>insoluble fiber.

<sup>6</sup>solubel fiber.

<sup>7</sup>neutral detergent fiber.

<sup>8</sup>acid detergent fiber.
